# Supplementary material
Source: PubMed Central journal article supplement (PMC3938148)
Supplement: supp_blood-2013-11-538694_blood-2013-11-538694-1.pdf [file supp_blood-2013-11-538694_blood-2013-11-538694-1.pdf]

## Supplemental Figures and Table – Krause et al.

**Table S1. Quantitation of engrafting proviral clones**

| <b>Figure 2B</b>          |         |         |                    |                    |                    |                    |         |         |         | <b>mean</b> | <b>S.D.</b> |      |
|---------------------------|---------|---------|--------------------|--------------------|--------------------|--------------------|---------|---------|---------|-------------|-------------|------|
| L-sel KO donor/WT recips  | lane 5  | lane 6  | lane 7             | lane 9             | lane 10            | lane 11            |         |         |         |             |             |      |
| # clones                  | 1       | 1       | 2                  | 1                  | 1                  | 1                  |         |         |         |             | 1.17        | 0.41 |
| <b>Figure 2C</b>          |         |         |                    |                    |                    |                    |         |         |         |             |             |      |
| WT donor/P-sel KO recips  | lane 12 | lane 13 | lane 14            |                    |                    |                    |         |         |         |             |             |      |
| # clones                  | 12      | 6       | 10                 |                    |                    |                    |         |         |         |             | 9.33        | 3.06 |
| <b>Figure 2D</b>          |         |         |                    |                    |                    |                    |         |         |         |             |             |      |
| PSGL-1 KO donor/WT recips | lane 15 | lane 16 | lane 17            |                    |                    |                    |         |         |         |             |             |      |
| # clones                  | 2       | 1       | 2                  |                    |                    |                    |         |         |         |             | 1.67        | 0.58 |
| <b>Figure 2E</b>          |         |         |                    |                    |                    |                    |         |         |         |             |             |      |
| WT donor/VCAM1 KO recips  | lane 20 | lane 21 | lane 22            |                    |                    |                    |         |         |         |             |             |      |
| # clones                  | 12      | 9       | 11                 |                    |                    |                    |         |         |         |             | 10.67       | 1.53 |
| <b>Figure 2F</b>          |         |         |                    |                    |                    |                    |         |         |         |             |             |      |
| WT donor/WT recips        | lane 3  | lane 4  | lane 2<br>(Fig 3B) | lane 3<br>(Fig 3B) | lane 3<br>(Fig 4F) | lane 4<br>(Fig 4F) |         |         |         |             |             |      |
| # clones                  | 4       | 4       | 4                  | 6                  | 6                  | 3                  |         |         |         |             | 4.50        | 1.22 |
| <b>Figure 3C</b>          |         |         |                    |                    |                    |                    |         |         |         |             |             |      |
| E-sel KO recips IV        | lane 7  | lane 8  | lane 9             | lane 10            | lane 11            | lane 12            | lane 13 |         |         |             |             |      |
| # clones                  | 1       | 1       | 2                  | 4                  | 3                  | 1                  | 1       |         |         |             | 1.86        | 1.21 |
| <b>Figure 3D</b>          |         |         |                    |                    |                    |                    |         |         |         |             |             |      |
| E-sel KO recip IF         | lane 14 | lane 15 | lane 16            | lane 17            | lane 18            | lane 19            |         |         |         |             |             |      |
| # clones                  | 5       | 5       | 2                  | 4                  | 2                  | 8                  |         |         |         |             | 4.33        | 2.25 |
| <b>Figure 4C</b>          |         |         |                    |                    |                    |                    |         |         |         |             |             |      |
| WT donors                 | lane 2  | lane 3  | lane 4             | lane 5             | lane 7             | lane 8             | lane 9  | lane 10 | lane 11 |             |             |      |
| # clones                  | 2       | 4       | 5                  | 1                  | 3                  | 2                  | 1       | 2       | 4       |             | 2.67        | 1.41 |
| <b>Figure 4D</b>          |         |         |                    |                    |                    |                    |         |         |         |             |             |      |
| PSGL-1/CD44 DKO donors    | lane 12 | lane 13 | lane 14            | lane 15            | lane 16            |                    |         |         |         |             |             |      |
| # clones                  | 1       | 1       | 2                  | 1                  | 1                  |                    |         |         |         |             | 1.20        | 0.45 |
| <b>Figure 4F</b>          |         |         |                    |                    |                    |                    |         |         |         |             |             |      |
| Core2 KO donors           | lane 5  | lane 6  | lane 7             | lane 8             |                    |                    |         |         |         |             |             |      |
| # clones                  | 1       | 2       | 2                  | 3                  |                    |                    |         |         |         |             | 2.00        | 0.82 |
| <b>Figure 4G</b>          |         |         |                    |                    |                    |                    |         |         |         |             |             |      |
| FucT IV/VII KO donors     | lane 9  | lane 10 | lane 11            | lane 12            |                    |                    |         |         |         |             |             |      |
| # clones                  | 1       | 2       | 1                  | 3                  |                    |                    |         |         |         |             | 1.75        | 0.96 |
| <b>Figure 5B</b>          |         |         |                    |                    |                    |                    |         |         |         |             |             |      |
| 0 mu/mL NA                | lane 2  | lane 3  | lane 4             | lane 5             | lane 6             |                    |         |         |         |             |             |      |
| # clones                  | 4       | 2       | 6                  | 3                  | 7                  |                    |         |         |         |             | 4.40        | 2.07 |
| <b>Figure 5C</b>          |         |         |                    |                    |                    |                    |         |         |         |             |             |      |
| 12.5 mU/mL NA             | lane 11 | lane 12 | lane 13            | lane 14            | lane 15            |                    |         |         |         |             |             |      |
| # clones                  | 2       | 3       | 2                  | 2                  | 1                  |                    |         |         |         |             | 2.00        | 0.71 |
| <b>Figure 6E</b>          |         |         |                    |                    |                    |                    |         |         |         |             |             |      |
| L-sel KO donors +E/L-sel  | lane 9  | lane 11 | lane 13            | lane 15            | lane 16            | lane 17            | lane 18 |         |         |             |             |      |
| # clones                  | 2       | 3       | 10                 | 2                  | 5                  | 2                  | 8       |         |         |             | 4.57        | 3.26 |
| <b>Figure 7B</b>          |         |         |                    |                    |                    |                    |         |         |         |             |             |      |
| MIG – WT donor            | lane 2  | lane 3  | lane 4             |                    |                    |                    |         |         |         |             |             |      |
| # clones                  | 13      | 11      | 7                  |                    |                    |                    |         |         |         |             | 10.33       | 3.06 |
| <b>Figure 7C</b>          |         |         |                    |                    |                    |                    |         |         |         |             |             |      |
| MIG – L-selectin KO donor | lane 5  | lane 6  | lane 7             |                    |                    |                    |         |         |         |             |             |      |
| # clones                  | 14      | 7       | 8                  |                    |                    |                    |         |         |         |             | 9.67        | 3.79 |
| <b>Figure 7C</b>          |         |         |                    |                    |                    |                    |         |         |         |             |             |      |
| no Ab                     | lane 2  | lane 3  | lane 4             |                    |                    |                    |         |         |         |             |             |      |
| # clones                  | 9       | 9       | 7                  |                    |                    |                    |         |         |         |             | 8.33        | 1.15 |
| <b>Figure 7D</b>          |         |         |                    |                    |                    |                    |         |         |         |             |             |      |
| isotype Ab                | lane 5  | lane 6  | lane 7             |                    |                    |                    |         |         |         |             |             |      |
| # clones                  | 9       | 8       | 8                  |                    |                    |                    |         |         |         |             | 8.33        | 0.58 |
| <b>Figure 7E</b>          |         |         |                    |                    |                    |                    |         |         |         |             |             |      |
| anti-L-selectin Ab        | lane 8  | lane 9  | lane 10            | lane 11            | lane 12            |                    |         |         |         |             |             |      |
| # clones                  | 3       | 2       | 5                  | 5                  | 4                  |                    |         |         |         |             | 3.80        | 1.30 |

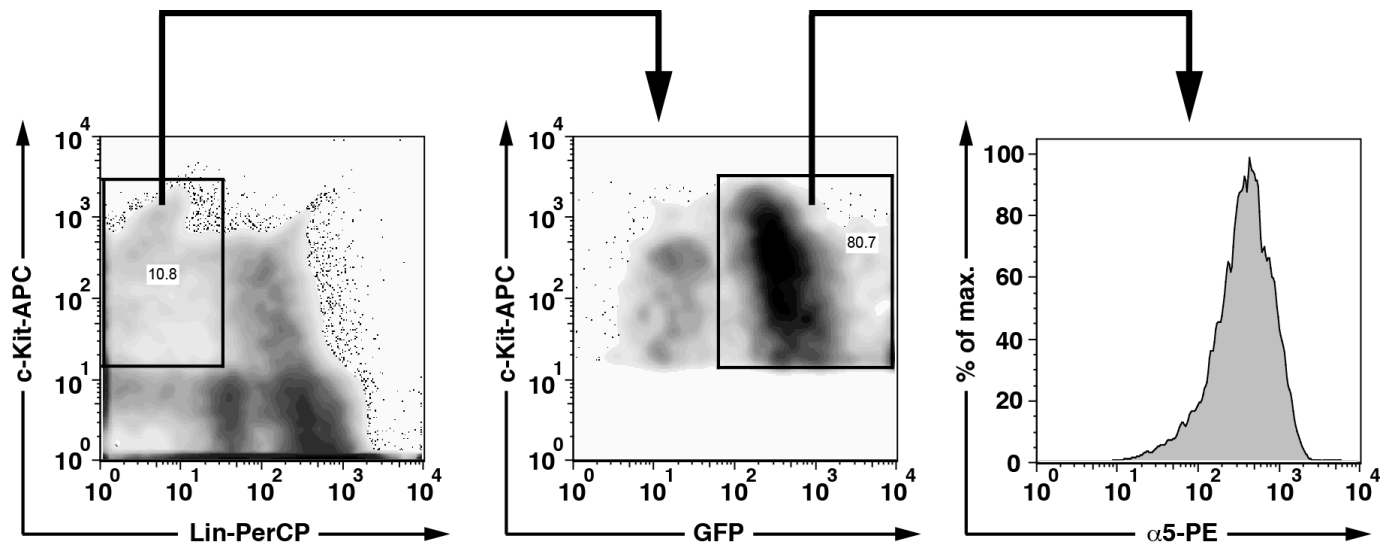

**Figure S1. Assessment of adhesion molecule expression on *BCR-ABL1*<sup>+</sup> stem/progenitor cells from leukemic mice.** Gating of a representative BM sample from a mouse with *BCR-ABL1*-induced CML-like MPN is illustrated. Lineage negative (Lin<sup>-</sup>) cells expressing c-Kit were predominantly (>80%) GFP<sup>+</sup>, and this subset expressed uniformly high levels of α5 integrin.

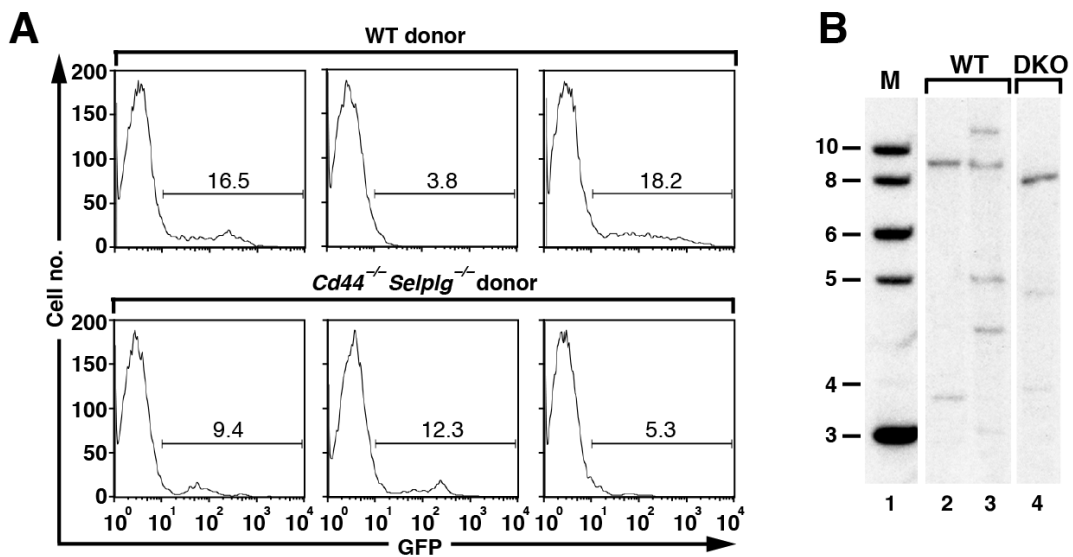

**Figure S2. Deficiency of CD44 and PSGL-1 does not significantly impair engraftment of non-BCR-ABL1-expressing stem cells.** (A) Levels of GFP<sup>+</sup> BM engraftment of WT recipients of WT (top panels) or CD44/PSGL-1 double knockout (bottom panels) HSC transduced with empty GFP retrovirus, assessed 2 mo post-transplantation. (B) Assessment of proviral engraftment in evaluable (with >10% GFP<sup>+</sup> BM cells) recipients from panel A. Recipients of transduced WT donor HSC had 2 and 5 proviral clones (lanes 2 and 3, respectively), while the only evaluable recipient of CD44/PSGL-1 double knockout (DKO) HSC had 3 proviral clones (lane 4). Lane 1 is a ladder of DNA molecular mass markers.

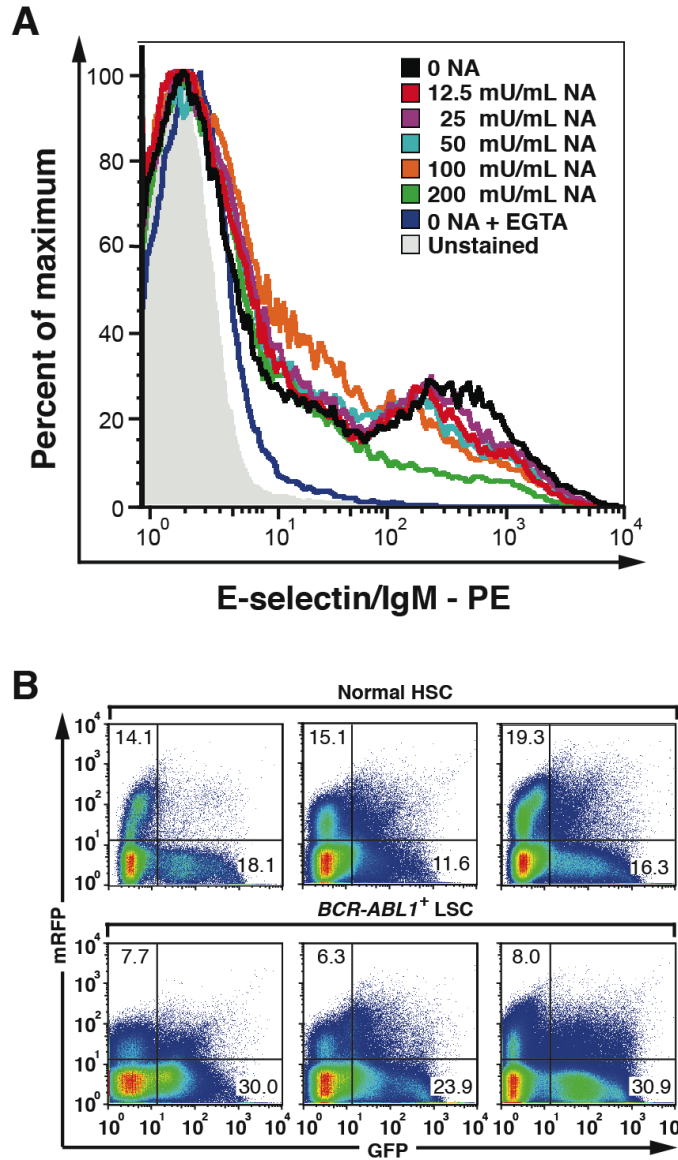

**Figure S3. Destruction of selectin ligands by neuraminidase impairs engraftment of *BCR-ABL1*<sup>+</sup> leukemic stem cells.** (A) Flow cytometric analysis of expression levels of E-selectin ligands on Lin<sup>-</sup>Kit<sup>+</sup> BM stem/progenitor cells following treatment with varying concentrations of neuraminidase (NA), assessed by staining with an E-selectin/IgM fusion protein. The profile of unstained cells is shown by the gray histogram, untreated cells by the black line, and untreated cells in the presence of EGTA (which abolishes selectin-ligand interactions) by the blue line. (B) Representative flow cytometric plots of mRFP and GFP expression in BM myeloid (Mac-1<sup>+</sup>) cells from recipients of NA-treated BM transduced with parental (top row) or *BCR-ABL1*-expressing (bottom row) retroviruses. The percentage of mRFP<sup>+</sup> and GFP<sup>+</sup> cells is indicated in each quadrant.
